# Supplementary material for: Pushing capacities and energy densities beyond theoretical limits of lithium primary batteries using active CFx nanocapsules with x > 1
Source: Royal Society of Chemistry journal article supplement (doi:10.1039/d2qi02027k), 2022-11-10
Supplement: d2qi02027k1.pdf [file d2qi02027k1.pdf]

## Electronic Supplementary Material

### Pushing Capacities and Energy Densities Beyond Theoretical Limits of Lithium Primary Batteries using active C<sub>F</sub>x Nanocapsules with x > 1

Yifan Liu<sup>a,b</sup>, Hongyan Zhang<sup>a,b</sup>, Baoshan Wu<sup>a,b</sup>, Jianyi Ma<sup>c</sup>, Guoyun Zhou<sup>a,\*</sup>, Nasir Mahmood<sup>d,\*</sup>, Xian Jian<sup>a,b,\*</sup>, Huakun Liu<sup>e</sup>

<sup>a</sup>School of Materials and Energy, University of Electronic Science and Technology of China, Chengdu, 611731, China.

<sup>b</sup>Yangtze Delta Region Institute (Huzhou), University of Electronic Science and Technology of China, Huzhou 313001, China.

<sup>c</sup>Institute of Atomic and Molecular Physics, Sichuan University, Chengdu, 610065, China.

<sup>d</sup>School of Engineering, RMIT University, VIC 3001 Australia.

<sup>e</sup>Institute for Superconducting and Electronic Materials, University of Wollongong, Wollongong, NSW 2522, Australia.

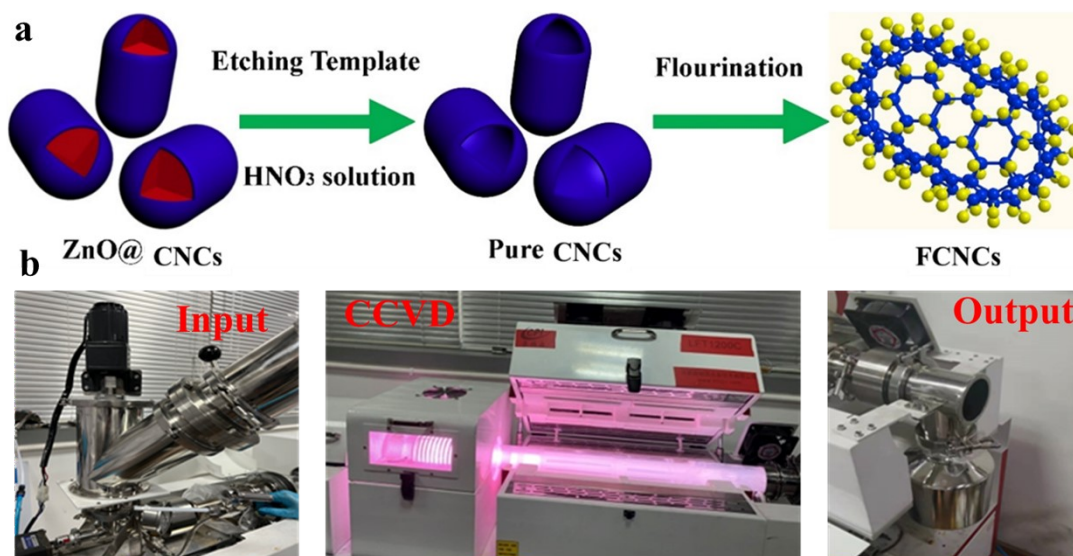

**Figure S1.** a. Schematic diagram of the synthetic route of CFNCs. b. The lab-made serialized CCVD device to prepare CNCs.

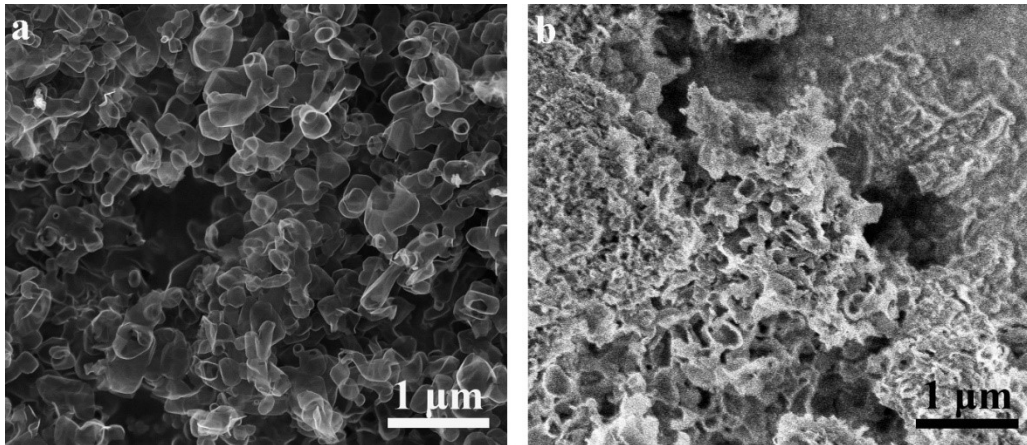

**Figure S2.** SEM images of the as-synthesized CNCs and CFNCs. a-b, CNCs synthesized by CCVD method. c-d, CFNCs-360 synthesized by fluorination process (without gold coating before recording SEM).

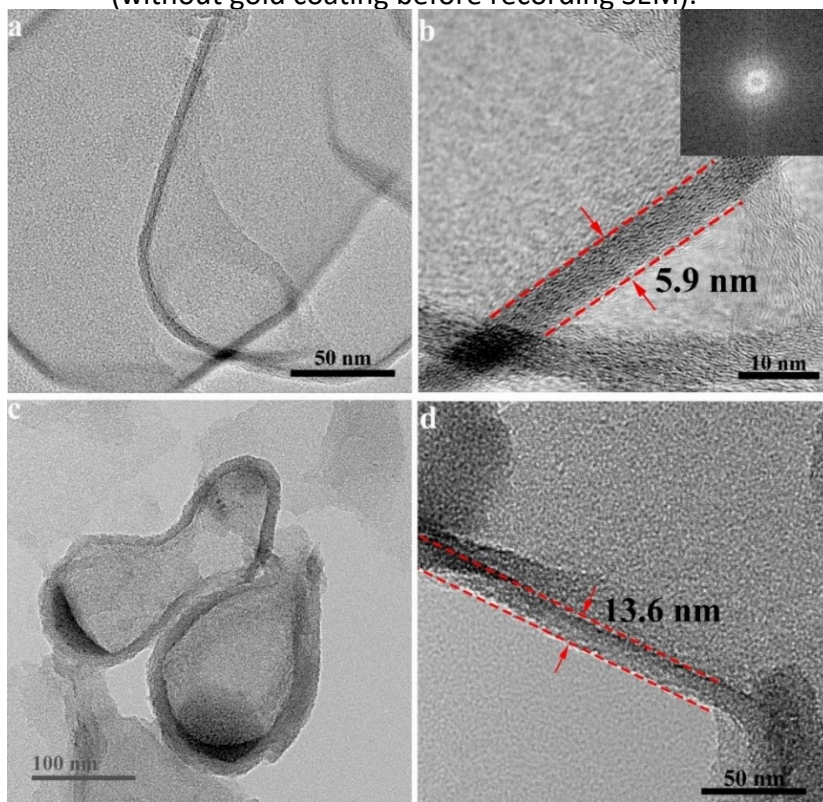

**Figure S3.** TEM images of as-synthesized CNCs and CFNCs. a, CNCs. b, the wall thickness of 5.9 nm for CNCs. c, CFNCs. d, the wall thickness of 13.6 nm for CFNCs.

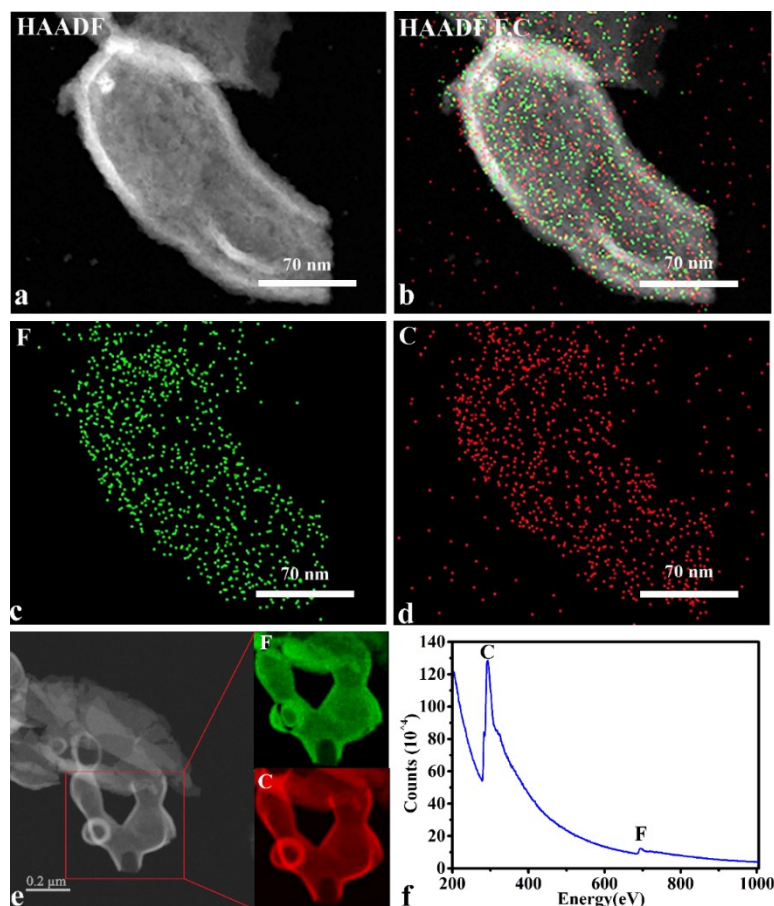

**Figure S4.** Element mapping of CFNC-360. a, HAADF-STEM image of CFNC-360. b, the distribution of F, C elements on the CFNC-360. c, F element. d, C element. e, EELS mapping for the selected zone. f, the EELS spectrum of the selected zone.

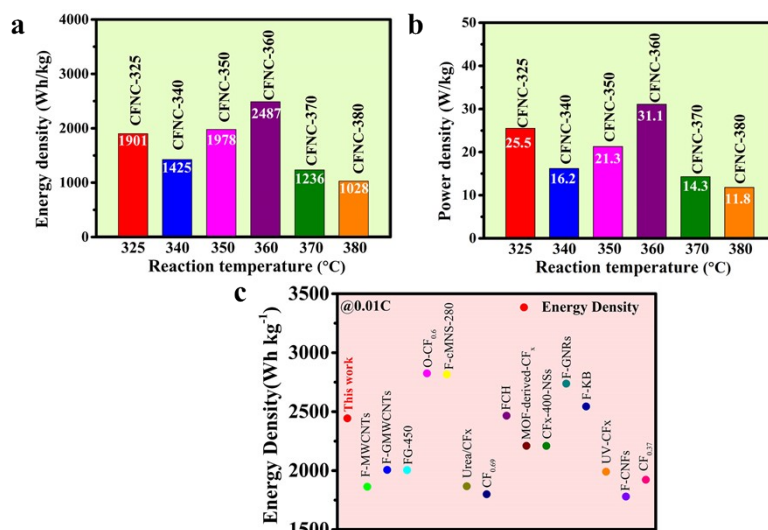

**Figure S5.** a, the energy density of CFNCs synthesized at different temperatures for Li/CFx battery. b, the power density of CFNCs synthesized at different temperatures for Li/CFx battery. c. comparison of energy density for CFNC-360 with various art exemplar fluorinated carbon active materials.



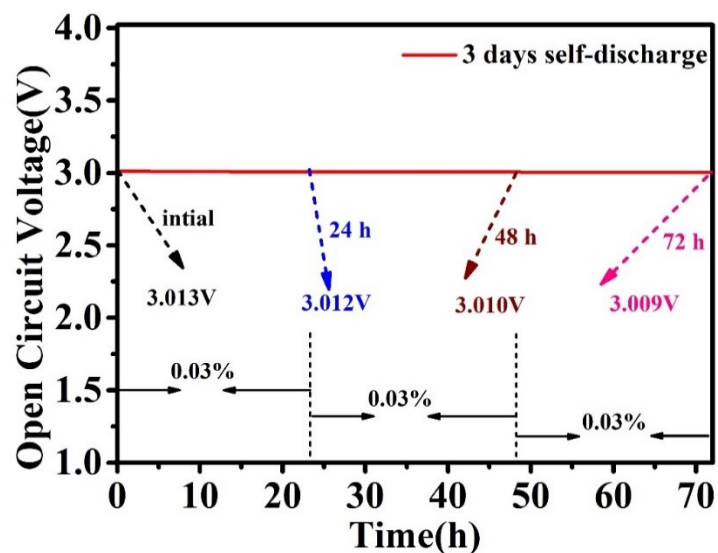

Figure S6. OCV stability of Li/CFx primary battery loaded with CFNCs materials testing over 3 days period.

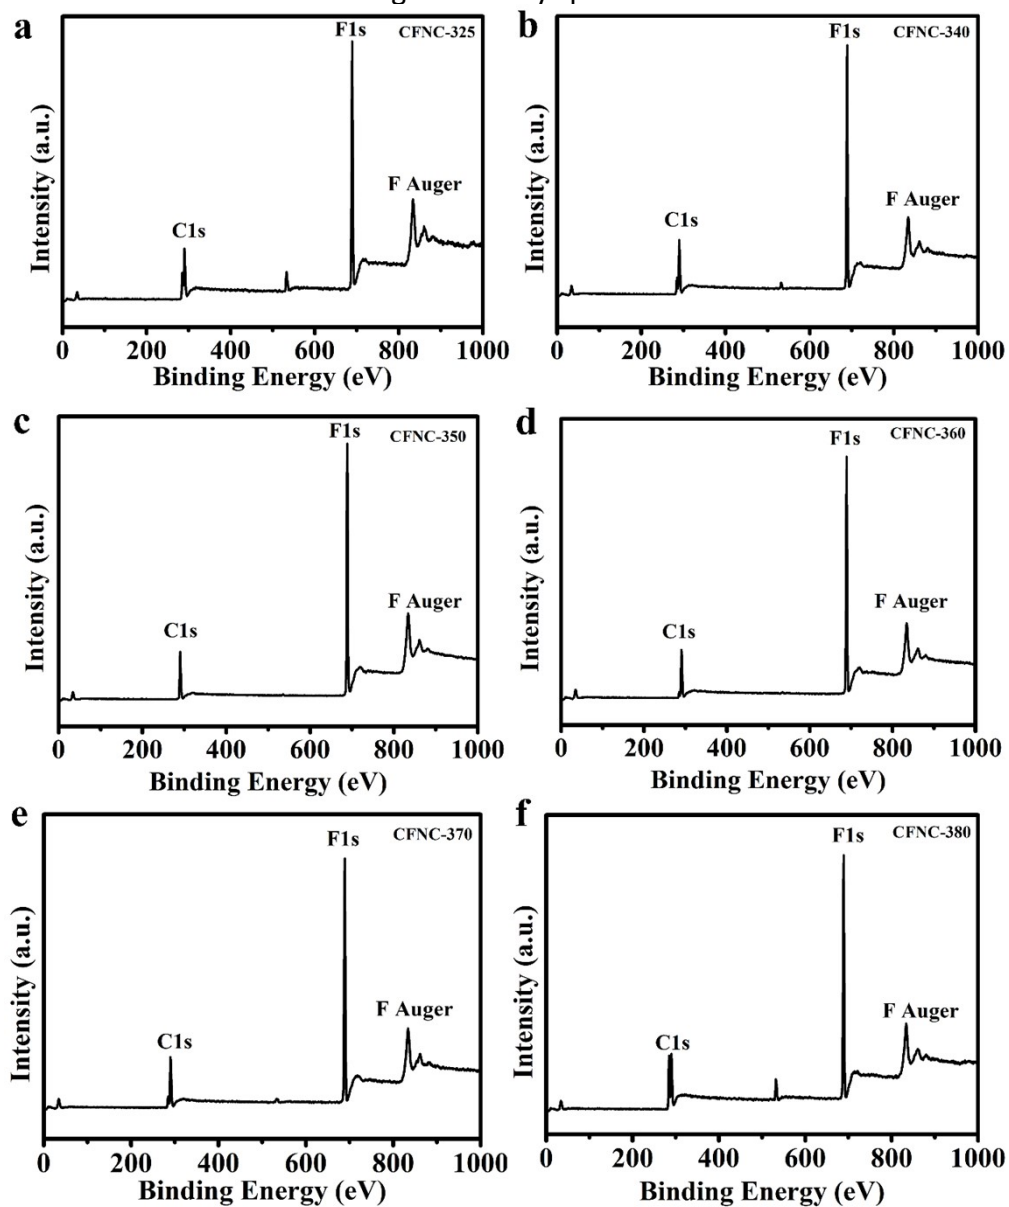

**Figure S7.** Survey spectrum of CFNCs. a, CFNC–325. b, CFNC–340. c, CFNC–350. d, CFNC–360. e, CFNC–370. f, CFNC–380.

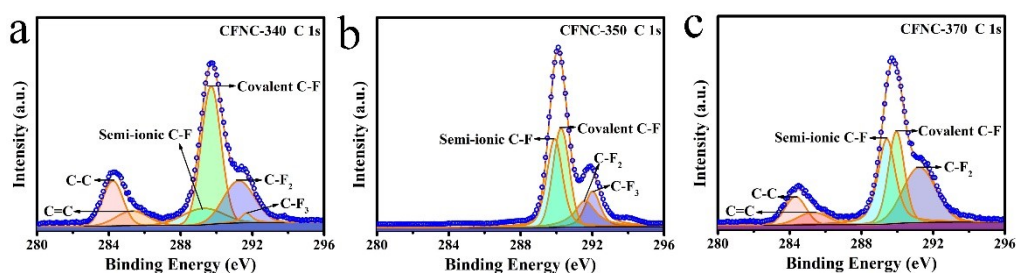

**Figure S8.** High-resolution XPS spectra of C1s for as-synthesized CFNCs prepared under different reaction temperatures. (a), 340°C. (b) 350°C. (c) 370°C.

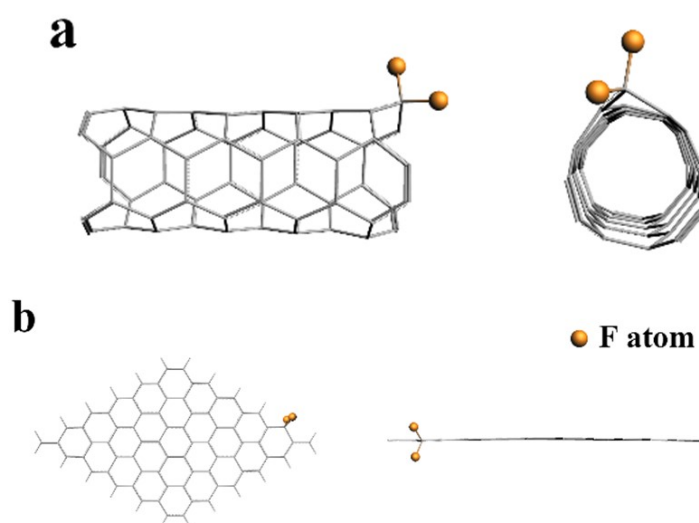

**Figure S9.** Schematic diagram of the fluorinated carbon materials with different curvatures from different viewing angles. (a) C-F<sub>2</sub> bond binding on carbon nanotubes with a radius of 2.15 Å, and (b) C-F<sub>2</sub> bond binding on graphene fragments with an infinite radius.

**Table S1.** The total transition metal (Fe, Co and Ni) content of CFNC–360 detected by ICP-AES.

| Sample   | Fe (wt.%) | Co (wt.%) | Ni (wt.%) | Zn (wt.%) |
|----------|-----------|-----------|-----------|-----------|
| CFNC–360 | 0.0028    | <0.0001   | <0.0001   | <0.0001   |

**Table S2.** Galvanostatic discharge performance of CFNCs at a discharge rate of 0.01C.

| Samples                               | CFNC–325 | CFNC–340 | CFNC–350 | CFNC–360 | CFNC–370 | CFNC–380 |
|---------------------------------------|----------|----------|----------|----------|----------|----------|
| F/C ratio                             | 0.97     | 1.17     | 1.49     | 1.61     | 1.51     | 1.37     |
| $Q_{theo}$ (mAh g <sup>-1</sup> )     | 854      | 916      | 991      | 1013     | 995      | 966      |
| $Q_{exp}$ (mAh g <sup>-1</sup> )      | 735      | 554      | 789      | 1056     | 502      | 429      |
| Energy density (Wh kg <sup>-1</sup> ) | 1901     | 1425     | 1978     | 2487     | 1236     | 1028     |

**Table S3.** The fitting parameters of Electrochemical impedance spectroscopy (EIS) for CFNCs.

| Samples           | CFNC-325    | CFNC-340     | CFNC -350    | CFNC -360   |
|-------------------|-------------|--------------|--------------|-------------|
| $R_s (\Omega)$    | 5.8         | 4.7          | 4.6          | 4.8         |
| $R_{ct} (\Omega)$ | 157         | 433          | 718          | 148         |
| $Z_w (S^{1/2})$   | $1.6e^{-3}$ | $1.23e^{-3}$ | $6.44e^{-4}$ | $4.5e^{-3}$ |

**Table S4.** Comparison of the performance CFNC-360 with the reported literature for specific capacity and energy density at 0.01C (1C=821mA g<sup>-1</sup>).

| Nominal materials                                                  | Discharge Capacity (mAh g <sup>-1</sup> ) | Energy Density (Wh kg <sup>-1</sup> ) <sup>1)</sup> | Discharge rate (C-rate) | Reference       |
|--------------------------------------------------------------------|-------------------------------------------|-----------------------------------------------------|-------------------------|-----------------|
| CFNC-360                                                           | 1056                                      | 2487                                                | 0.01C                   | This work       |
| Fluorinated multi-walled carbon nanotubes (FCNTs)                  | 764.0                                     | 1863.9                                              | 0.01C                   | S <sup>1</sup>  |
| Fluorinated graphitized multiwalled carbon nanotubes (FGCNTs)      | 798.8                                     | 2006.6                                              | 0.01C                   | S <sup>1</sup>  |
| Fluorinated Nanographite (FG-450)                                  | 837.4                                     | 2004.5                                              | 0.01C                   | S <sup>2</sup>  |
| Oxidized sub-fluorinated graphite Fluorides (O-CF <sub>0.6</sub> ) | 870                                       | 2825                                                | 0.01C                   | S <sup>3</sup>  |
| fluorinated calcinated macadamia nut shell (F-cMNS-280)            | 949                                       | 2816                                                | 0.01C                   | S <sup>3</sup>  |
| Urea-assistant ball-milled CFx (Urea/CFx)                          | 747.3                                     | 1867.9                                              | 0.01C                   | S <sup>4</sup>  |
| CF <sub>0.69</sub>                                                 | 647                                       | 1880                                                | 0.01C                   | S <sup>5</sup>  |
| fluorinated hard carbon (FHC)                                      | 922.6                                     | 2466                                                | 0.01C                   | S <sup>6</sup>  |
| MOF-derived nanoporous fluorinated carbon (MOF-derived-CFx)        | 850.3                                     | 2110.7                                              | 0.01C                   | S <sup>7</sup>  |
| Fluorinated graphite nanosheets (CFx-400 NSs)                      | 921                                       | 2210                                                | 0.01C                   | S <sup>8</sup>  |
| Fluorinated graphene nanoribbons (F-GNRs)                          | 939.2                                     | 2738                                                | 0.01C                   | S <sup>9</sup>  |
| fluorinated ketjenblack (FKB)                                      | 924.6                                     | 2544                                                | 0.01C                   | S <sup>10</sup> |
| UV-radiation fluorinated carbon (UV-CFx)                           | 798.2                                     | 1990.9                                              | 0.01C                   | S <sup>11</sup> |
| fluorinated Carbon nanofibers (FCNFs)                              | 748                                       | 1780                                                | 0.01C                   | S <sup>12</sup> |
| Sub-fluorinated thin carbon nanotubes (CF <sub>0.37</sub> )        | 900                                       | 1923                                                | 0.01C                   | S <sup>13</sup> |

**Table S5.** Surface chemical bond contents for various CFNCs based on XPS analysis.

| Sample | Different bonds content (at%) |
|--------|-------------------------------|
|        |                               |

|         | C-C  | C=C  | Semi-ionic C-F | Covalent C-F | C-F <sub>2</sub> | C-F <sub>3</sub> |
|---------|------|------|----------------|--------------|------------------|------------------|
| FGC-325 | 21.0 | 14.3 | 11.2           | 34.1         | 9.9              | 9.5              |
| FGC-340 | 14.6 | 7.5  | 10.6           | 44.0         | 21.0             | 2.3              |
| FGC-350 | -    | -    | 34.4           | 34.5         | 17.3             | 13.8             |
| FGC-360 | 7.3  | -    | 33.6           | 37.2         | 15.1             | 6.8              |
| FGC-370 | 9.4  | 6.1  | 29.9           | 25.5         | 29.2             | -                |
| FGC-380 | 41.7 | 7.2  | 3.4            | 36.4         | 11.3             | -                |

**Table S6.** F/C ratios for various CFNCs based on XPS observations.

| Samples   | CFNC-325 | CFNC-340 | CFNC-350 | CFNC-360 | CFNC-370 | CFNC-380 |
|-----------|----------|----------|----------|----------|----------|----------|
| F/C ratio | 0.92     | 1.07     | 1.47     | 1.24     | 1.15     | 0.71     |

**Table S7.** Binding energies of C<sub>24</sub>F<sub>36</sub>Li supercell structure in air and aqueous systems.

| Structure                            | E1(eV) | E2(eV) | ΔE(eV) |
|--------------------------------------|--------|--------|--------|
| C <sub>24</sub> F <sub>36</sub> Li-g | 0.79   | 0.67   | 0.12   |
| C <sub>24</sub> F <sub>36</sub> Li-s | 2.36   | 0.74   | 1.62   |

**Table S8.** Bonding energies of C-F<sub>2</sub> with different curvatures.

| Model                                  | C <sub>tube</sub> -F <sub>2</sub> | C <sub>plane</sub> -F <sub>2</sub> |
|----------------------------------------|-----------------------------------|------------------------------------|
| E <sub>bonding energy</sub> (Kcal/mol) | 105.81                            | 143.66                             |

## References

1. Y. Y. Li, X. Z. Wu, C. Liu, S. Wang, P. F. Zhou, T. Zhou, Z. C. Miao, W. Xing, S. P. Zhuo and J. Zhou, Fluorinated multi-walled carbon nanotubes as cathode materials of lithium and sodium primary batteries: effect of graphitization of carbon nanotubes, *J Mater Chem A*, 2019, **7**, 7128-7137.
2. L. Wang, Y. Y. Li, S. Wang, P. F. Zhou, Z. D. Zhao, X. W. Li, J. Zhou and S. P. Zhuo, Fluorinated Nanographite as a Cathode Material for Lithium Primary Batteries, *Chemelectrochem*, 2019, **6**, 2201-2207.
3. M. Mar, M. Dubois, K. Guerin, N. Batische, B. Simon and P. Bernard, High energy primary lithium battery using oxidized sub-fluorinated graphite fluorides, *Journal of Fluorine Chemistry*, 2019, **227**.
4. P. Zhou, J. Weng, X. Liu, Y. Li, L. Wang, X. Wu, T. Zhou, J. Zhou and S. Zhuo, Urea-assistant ball-milled CF<sub>x</sub> as electrode material for primary lithium battery with improved energy density and power density, *J. Power Sources*, 2019, **414**, 210-217.
5. Q. Zhang, K. J. Takeuchi, E. S. Takeuchi and A. C. Marschilok, Progress towards high-power Li/CF<sub>x</sub> batteries: electrode architectures using carbon nanotubes with CF<sub>x</sub>, *Physical Chemistry Chemical Physics*, 2015, **17**, 22504-22518.
6. R. X. Zhou, Y. Li, Y. Y. Feng, C. Peng and W. Feng, The electrochemical performances of fluorinated hard carbon as the cathode of lithium primary batteries, *Composites Communications*, 2020, **21**.
7. X. T. Li, H. C. Zhang, C. Liu, J. Y. Qiao and X. M. Zhou, A MOF-derived multifunctional nano-porous fluorinated carbon for high performance lithium/fluorinated carbon primary batteries, *Micropor Mesopor*

- Mat*, 2021, **310**.
8. X. X. Yang, G. J. Zhang, B. S. Bai, Y. Li, Y. X. Li, Y. Yang, X. Jian and X. W. Wang, Fluorinated graphite nanosheets for ultrahigh-capacity lithium primary batteries, *Rare Metals*, 2021, **40**, 1708-1718.
  9. C. Peng, L. C. Kong, Y. Li, H. Y. Fu, L. D. Sun, Y. Y. Feng and W. Feng, Fluorinated graphene nanoribbons from unzipped single-walled carbon nanotubes for ultrahigh energy density lithium-fluorinated carbon batteries, *Science China-Materials*, 2021, **64**, 1367-1377.
  10. S. B. Jiang, P. Huang, J. C. Lu and Z. C. Liu, The electrochemical performance of fluorinated ketjenblack as a cathode for lithium/fluorinated carbon batteries, *Rsc Advances*, 2021, **11**, 25461-25470.
  11. J. Ma, Y. F. Liu, Y. Peng, X. X. Yang, J. Hou, C. Liu, Z. W. Fang and X. Jian, UV-radiation inducing strategy to tune fluorinated carbon bonds delivering the high-rate Li/CF<sub>x</sub> primary batteries, *Compos Part B-Eng*, 2022, **230**.
  12. Y. Ahmad, K. Guérin, M. Dubois, W. Zhang and A. Hamwi, Enhanced performances in primary lithium batteries of fluorinated carbon nanofibers through static fluorination, *Electrochim. Acta*, 2013, **114**, 142-151.
  13. Y. Ahmad, M. Dubois, K. Guérin, A. Hamwi and E. Flahaut, High energy density of primary lithium batteries working with sub-fluorinated few walled carbon nanotubes cathode, *J. Alloys Compd.*, 2017, **726**, 852-859.
